# Supplementary material for: DNAzyme-powered AuNR-DNA walker for visual detection of Escherichia coli
Source: Royal Society of Chemistry journal article supplement (doi:10.1039/d3nj02386a), 2023-01-01
Supplement: d3nj02386a1.pdf [file d3nj02386a1.pdf]

## Supporting Information

### **DNAzyme-powered AuNRs-DNA walker for Visual Detection of *Escherichia coli***

*Zongqiang Li*<sup>a†</sup>, *Jingjing Li*<sup>a†</sup>, *Xu Wang*<sup>b</sup>, *Qianru Li*<sup>c</sup>, *Jingru Zhu*<sup>a</sup>, *Yuying Yao*<sup>a</sup>,

*Zhiqiang Guo*<sup>d</sup>, *Yu Wang*<sup>a</sup>, *Su Liu*<sup>c</sup>, *Jiadong Huang*<sup>ad\*</sup>

<sup>a</sup> College of Biological Sciences and Technology, University of Jinan, Jinan 250022, P.R. China.

<sup>b</sup> Shandong Institute of Metrology and Science, Jinan 250014, P.R. China.

<sup>c</sup> School of Water Conservancy and Environment, University of Jinan, Jinan 250022, P.R. China.

<sup>d</sup> Key Laboratory of Chemical Sensing & Analysis in Universities of Shandong, School of Chemistry and Chemical Engineering, University of Jinan, Jinan 250022, P.R. China.

\*Corresponding Author. E-mail: [chm\\_huangjd@ujn.edu.cn](mailto:chm_huangjd@ujn.edu.cn); Tel.: +86-531-89736122; Fax: +86-531-82769122.

## **Table of content:**

1. **Table S1.** The sequences of oligonucleotides used in this work.
2. **Table S2.** Comparison of different methods for *E. coli* determination.
3. **Figure S1.** Feasibility of polyacrylamide gel electrophoresis analysis.

**Table S1** The sequences of oligonucleotides used in this work.

| Oligonucleotides name | Sequence (5' to 3') description                                |
|-----------------------|----------------------------------------------------------------|
| Apt                   | CCGGACGCTTATGCCTTGCCATCTACAGAGCAGGTGTGACGG                     |
| T                     | TCCGTCACACCTTTTAAAGCGTCCGG                                     |
| HAP                   | SH-polyT(10)-TGGGTAGGGCGGGTTGGGACTAT/rA/GGAAGAGA<br>AAAGCCCTAC |
| I                     | AAGAGACCGGACGCTTAAAAAGGTGTGACGGA                               |
| Dz                    | SH-polyT(55)-ACCTTTTAAAGCGTCCGGTCTCTCTCCGAGCCGG<br>TCGAAATAGT  |

**Table S2.** Comparison of different methods for *E. coli* determination.

| Signal read-out methods             | LOD (cfu/mL)         | Linear range (cfu/mL)               | References |
|-------------------------------------|----------------------|-------------------------------------|------------|
| Surface Enhanced Raman Spectroscopy | $1.5 \times 10^2$    | $1.5 \times 10^2 - 3.0 \times 10^5$ | [1]        |
| Colorimetric Assay                  | $4.1 \times 10^1$    | $1.2 \times 10^2 - 3.6 \times 10^3$ | [2]        |
| Electrochemical                     | $1.0 \times 10^1$    | $1.0 \times 10^1 - 1.0 \times 10^7$ | [3]        |
| Electrochemical                     | $7.0 \times 10^1$    | $1.0 \times 10^1 - 1.0 \times 10^5$ | [4]        |
| Electrochemiluminescence            | $2.5 \times 10^{-4}$ | $5.0 \times 10^2 - 5.0 \times 10^5$ | [5]        |
| Colorimetric Assay                  | $1.0 \times 10^2$    | $0 - 1.0 \times 10^5$               | [6]        |
| Colorimetric Assay                  | $5.8 \times 10^0$    | $1.0 \times 10^1 - 1.0 \times 10^5$ | This work  |

**Figure S1.** Feasibility of polyacrylamide gel electrophoresis analysis.

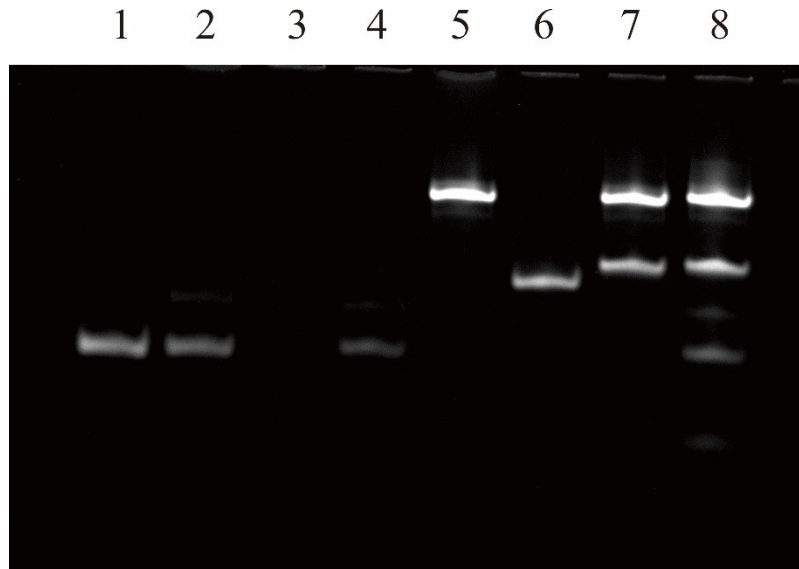

**Figure. S1** Feasibility of polyacrylamide gel electrophoresis analysis. Lane 1, Apt; Lane 2, HAP  
Lane 3, T; Lane 4, I; Lane 5, Dz; Lane 6, Apt-T; Lane 7, Mix T, I and Dz; Lane 8, probe incubated  
with *E. coli*.

## References

- [1] S.K. Srivastava, H.B. Hamo, A. Kushmaro, R.S. Marks, C. Gruner, B. Rauschenbach, I. Abdulhalim, Highly sensitive and specific detection of *E. coli* by a SERS nanobiosensor chip utilizing metallic nanosculptured thin films, *Analyst* 140(9) (2015) 3201-9.
- [2] Y. Xie, Y. Huang, J. Li, J. Wu, A trigger-based aggregation of aptamer-functionalized gold nanoparticles for colorimetry: An example on detection of *Escherichia coli* O157:H7, *Sensors Actuators B: Chem.* 339 (2021).
- [3] W. Zhang, C. Luo, L. Zhong, S. Nie, W. Cheng, D. Zhao, S. Ding, Sensitive detection of enteropathogenic *E. coli* using a *bfpA* gene-based electrochemical sensor, *Microchimica Acta* 180(13-14) (2013) 1233-1240.
- [4] E.B. Settingington, E.C. Alocilja, Rapid electrochemical detection of polyaniline-labeled *Escherichia coli* O157:H7, *Biosens. Bioelectron.* 26(5) (2011) 2208-14.
- [5] H. Yang, Y. Wang, H. Qi, Q. Gao, C. Zhang, Electrogenerated chemiluminescence biosensor incorporating ruthenium complex-labelled Concanavalin A as a probe for the detection of *Escherichia coli*, *Biosens. Bioelectron.* 35(1) (2012) 376-381.
- [6] W. Ren, W. Liu, J. Irudayaraj, A net fishing enrichment strategy for colorimetric detection of *E. coli* O157:H7, *Sensors Actuators B: Chem.* 247 (2017) 923-929.
